# Supplementary material for: Coordination assemblies of Zn(NO3)2 with 4-pyr-poly-2-ene and polycarboxylates: structural diversification and photoluminescence properties
Source: Royal Society of Chemistry journal article supplement (doi:10.1039/c5ra07371e), 2015-01-01
Supplement: c5ra07371e1.pdf [file c5ra07371e1.pdf]

## Electronic Supplementary Information (ESI)

### Coordination assemblies of $\text{Zn}(\text{NO}_3)_2$ with 4-pyr-poly-2-ene and polycarboxylates: structural diversification and photoluminescence properties

Dong Liu,<sup>\*a</sup> Yu Ge,<sup>a</sup> Ni-Ya Li,<sup>a</sup> Wei Ma,<sup>a</sup> and Xiao-Yan Tang<sup>\*b</sup>

<sup>a</sup> College of Chemistry and Materials Science, Huaibei Normal University, Huaibei 235000, P. R. China. Fax: 86-561-3806281; E-mail: dongliu@chnu.edu.cn

<sup>b</sup> School of Chemistry and Materials Engineering, Changshu Insititute of Technology, Changshu 215500, Jiangsu, P. R. China. E-mail: tangxy@cslg.edu.cn

## Table of Contents

**Fig. S1** Experimental and simulated PXRD patterns for **1** (a); **2** (b); **3** (c); **4** (d) and **5**(e). .....S3

**Fig. S2** The TGA curves for **1–5**. .....S5

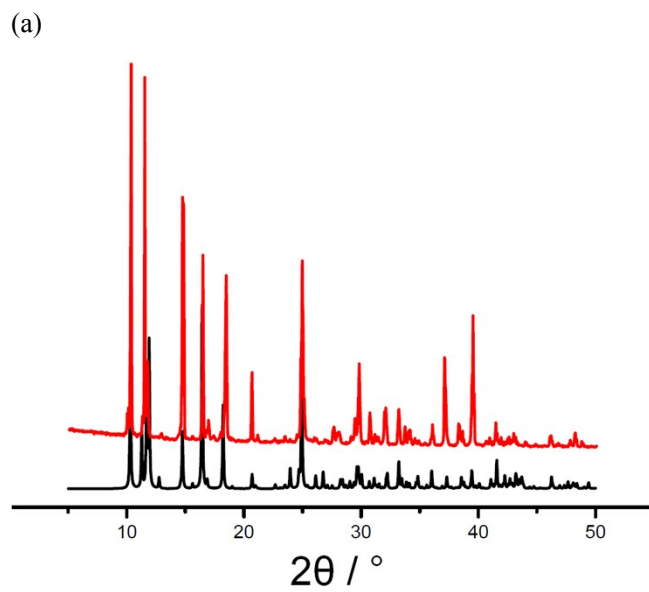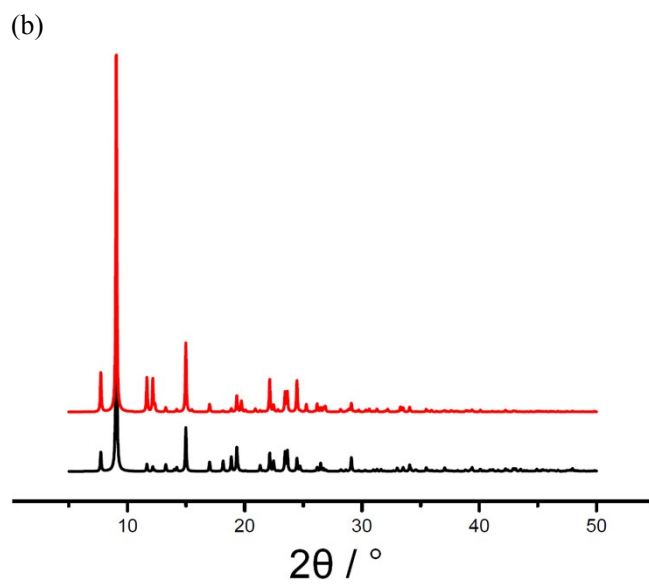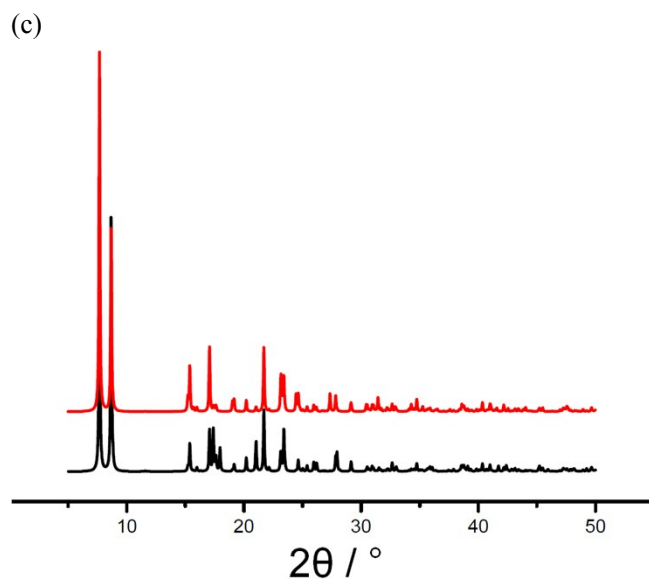

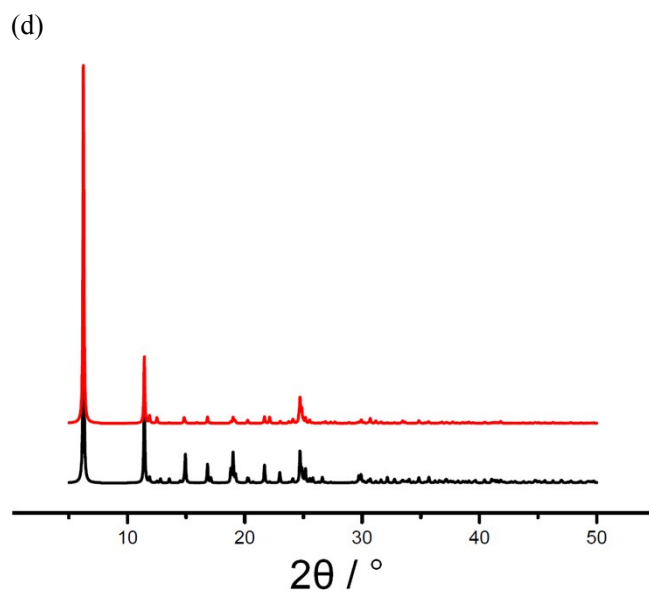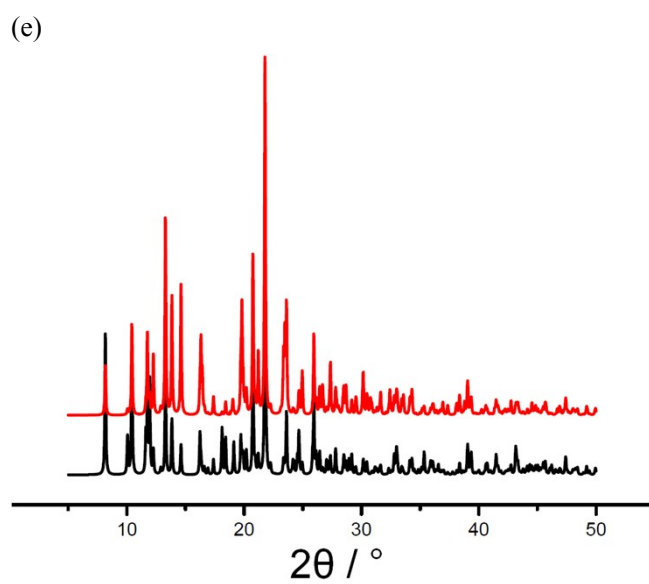

**Fig. S1** PXRD patterns for **1** (a, experimental: red; simulated: black); **2** (b, experimental: red; simulated: black); **3** (c, experimental: red; simulated: black); **4** (d, experimental: red; simulated: black) and **5** (e, experimental: red; simulated: black).

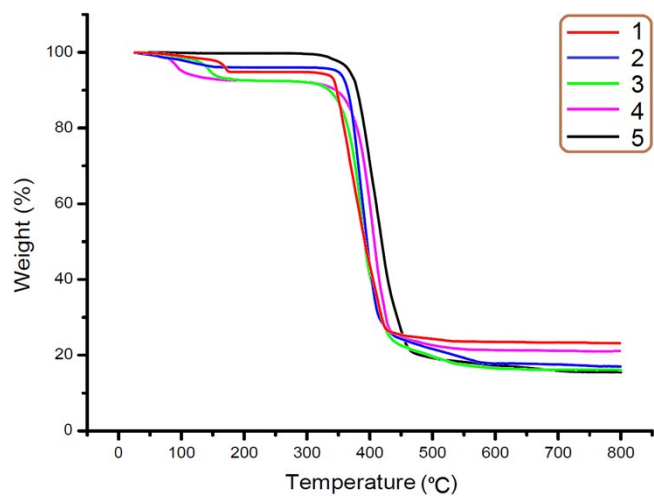

**Fig. S2** The TG curves for 1–5.
